# Supplementary material for: Prochelators modulate azole activity against Candida albicans in a metal-dependent manner
Source: Royal Society of Chemistry journal article supplement (doi:10.1039/d6cb00073h), 2026-04-29
Supplement: d6cb00073h1.pdf [file d6cb00073h1.pdf]

## Supplementary Information

# Prochelators modulate azole activity against *Candida albicans* in a metal-dependent manner

Madeline Ann Merriman,<sup>a</sup> Catherine A. Denning-Jannace,<sup>a</sup> Andrea Barboza Hurtado,<sup>a</sup> Francesca A. Vaccaro,<sup>a</sup> Yu-Shien Sung,<sup>b</sup> Elisa Tomat,<sup>b,c</sup> Katherine J. Franz<sup>\*a</sup>

<sup>a</sup>Department of Chemistry, Duke University, French Family Science Center, 124 Science Drive, Durham, North Carolina 27708, United States

<sup>b</sup>The University of Arizona, Department of Chemistry and Biochemistry, Tucson, Arizona 85721-0041, United States

<sup>c</sup>University of Vienna, Faculty of Chemistry, Institute of Inorganic Chemistry, 1090 Wien, Austria

\*corresponding author

Email: [Katherine.franz@duke.edu](mailto:Katherine.franz@duke.edu)

## Table of Contents

### SI Figures and Tables

**Figure S1.** UV-visible spectra of prochelators in MOPS buffer over 8 h

**Figure S2.** UV-visible spectra of (AH1-S)<sub>2</sub> with dithiothreitol and glutathione in MOPS buffer and SD

**Figure S3.** UV-visible spectra of (AH1-S)<sub>2</sub> with added vitamins in MOPS buffer

**Figure S4.** LC-MS analysis showing the light-dependent degradation of (AH1-S)<sub>2</sub> with riboflavin

**Figure S5.** Total ion chromatogram and extracted chromatogram of (AH1-S)<sub>2</sub> with riboflavin in MOPS under ambient light vs minimal light conditions

**Figure S6.** Representative mass spectra of (AH1-S)<sub>2</sub> and riboflavin

**Figure S7.** Microdilutions of (AH1-S)<sub>2</sub> against *C. albicans* in dark and ambient light

**Figure S8.** Microdilutions of fluconazole, voriconazole, econazole, and clotrimazole against *C. albicans* in SD medium

**Figure S9.** Two dimensional in-broth microdilutions (checkerboards) of fluconazole and prochelators against fluconazole-resistant *C. albicans* strain Y172

**Figure S10.** Growth assays of *C. albicans* SC5314 treated with fluconazole and various controls of (AH1-S)<sub>2</sub>, including light vs dark, pre-reduction, hydrolysis components, and photodegradation products

**Figure S11.** Cidalty assays of *C. albicans* SC5314 treated with (AH1-S)<sub>2</sub>, (IT1-S)<sub>2</sub>, fluconazole, or a combination

**Figure S12.** Comparison of relative growth levels of *C. albicans* SC5314 grown in YPD in the large culture volumes used for ICP-MS experiments

**Figure S13.** Dependence of EPR spectra of *C. albicans* as a function of (AH1-S)<sub>2</sub> concentration, at 90 min and 6 h

**Figure S14.** Time dependence of EPR spectra of non-treated *C. albicans* compared to treatment with 25 μM (AH1-S)<sub>2</sub> for 45 min, 90 min, 3 h, and 6 h

**Figure S15.** Whole cell EPR spectra of *C. albicans* treated with fluconazole at 90 min and copper at 6 h

**Figure S16.** Colony forming units of *C. albicans* in monoculture and macrophage cytotoxicity in monoculture under mammalian cell culture conditions

**Figure S17.** Representative images of macrophage and *C. albicans* monocultures treated with (AH1-S)<sub>2</sub> and fluconazole under mammalian cell culture conditions

**Table S1:** Components in Synthetic Defined media

**Table S2:** Average values with standard deviations of cellular metals detected by ICP-MS

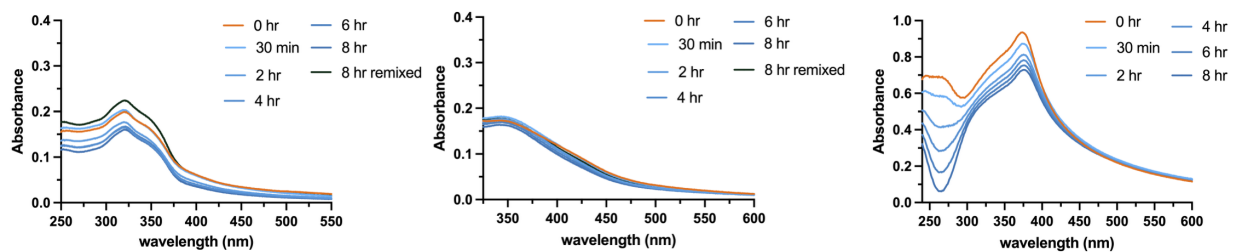

**Figure S1.** UV-visible spectra of 15  $\mu\text{M}$   $(AH1-S)_2$  (left), 15  $\mu\text{M}$   $(IT1-S)_2$  (middle), and  $(TC1-S)_2$  (right) in MOPS buffer (1 % DMSO) over 8 h. Due to visible precipitation of  $(244mTC-S)_2$  when diluted from DMSO stock into MOPS buffer with 1 % DMSO, spectra not shown.

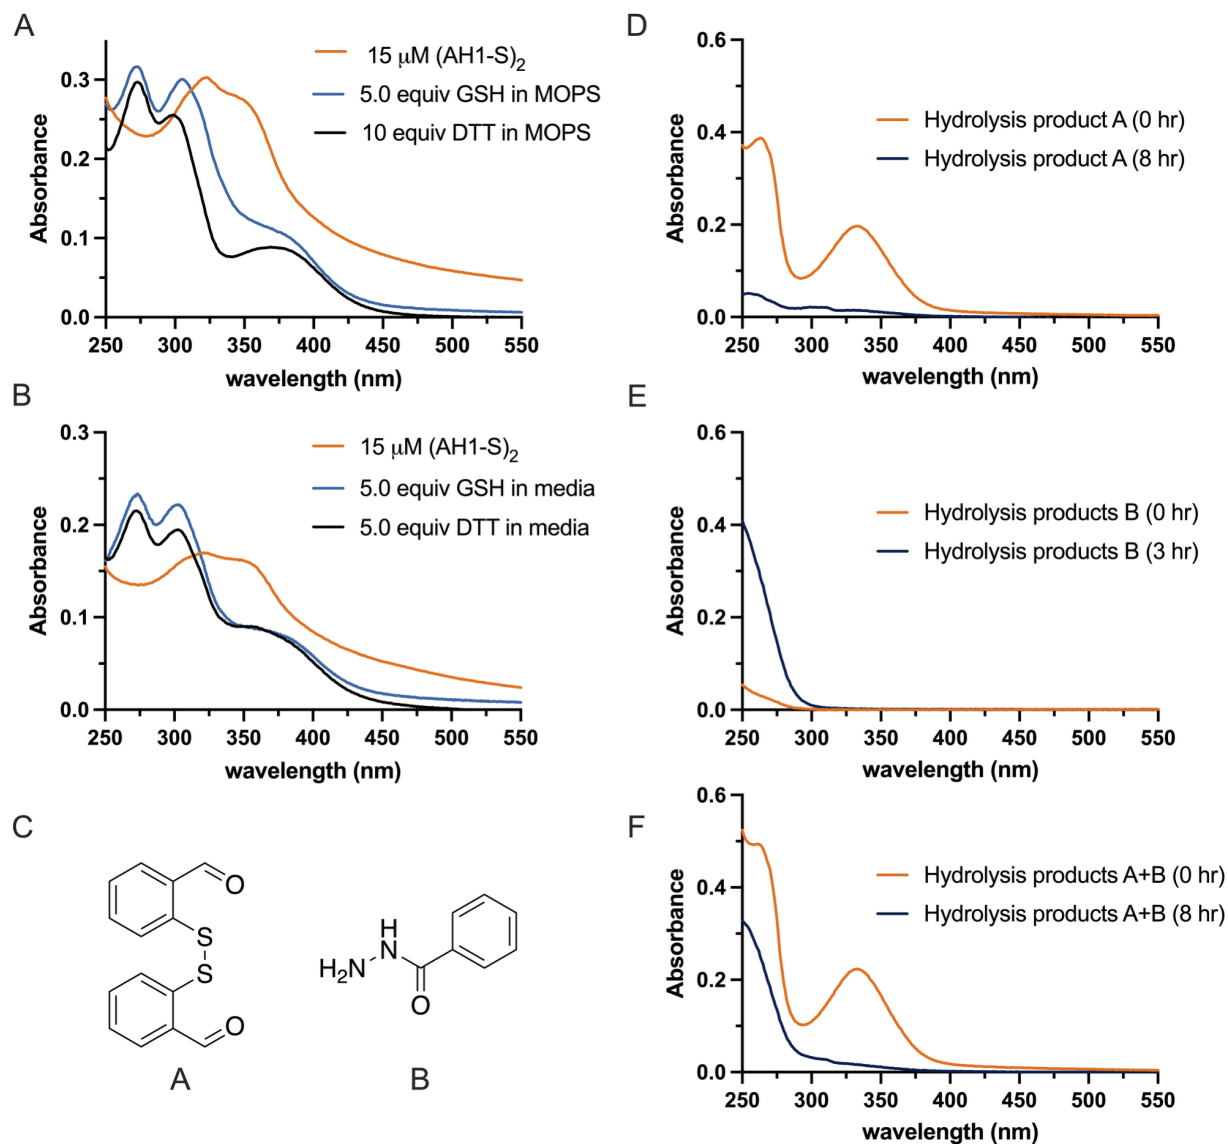

**Figure S2.** UV-visible spectra of 15  $\mu\text{M}$  (AH1-S)<sub>2</sub> in **(A)** MOPS buffer or **(B)** SD medium before and after addition of 5 equivalents of glutathione (GSH, light blue) or dithiothreitol (DTT, dark blue). Solutions contain no more than 1 % DMSO. **(C)** Structures of hydrolysis products A (2,2'-dithioldibenzyl aldehyde) and B (benzoylhydrazine). **(D)** UV-visible spectra of 15  $\mu\text{M}$  hydrolysis product A, **(E)** 30  $\mu\text{M}$  hydrolysis product B, or **(F)** a combination of A + B in SD medium (1 % DMSO) over time.

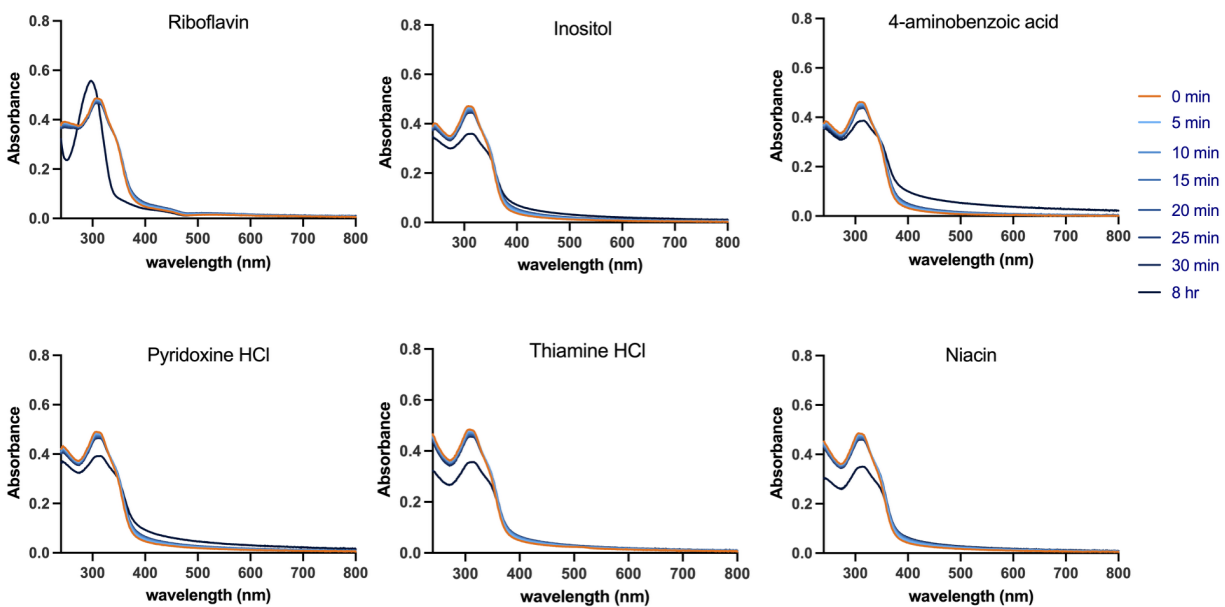

**Figure S3.** UV-visible spectra of 15  $\mu\text{M}$   $(\text{AH1-S})_2$  in MOPS buffer (1 % DMSO) with the addition of either 5.3  $\mu\text{M}$  riboflavin, 14.6  $\mu\text{M}$  4-aminobenzoic acid, 111  $\mu\text{M}$  inositol, 19.4  $\mu\text{M}$  pyridoxine HCl, 10.7  $\mu\text{M}$  thiamine HCl, or 32.5  $\mu\text{M}$  niacin. Concentration of vitamins were chosen based upon the amount in SD medium. Scans were taken every 5 min up to 30 min, and a final scan was taken at 8 h. To account for changes in absorbance due to vitamin alone, each spectrum was adjusted by subtracting the absorbance of the vitamin's spectrum.

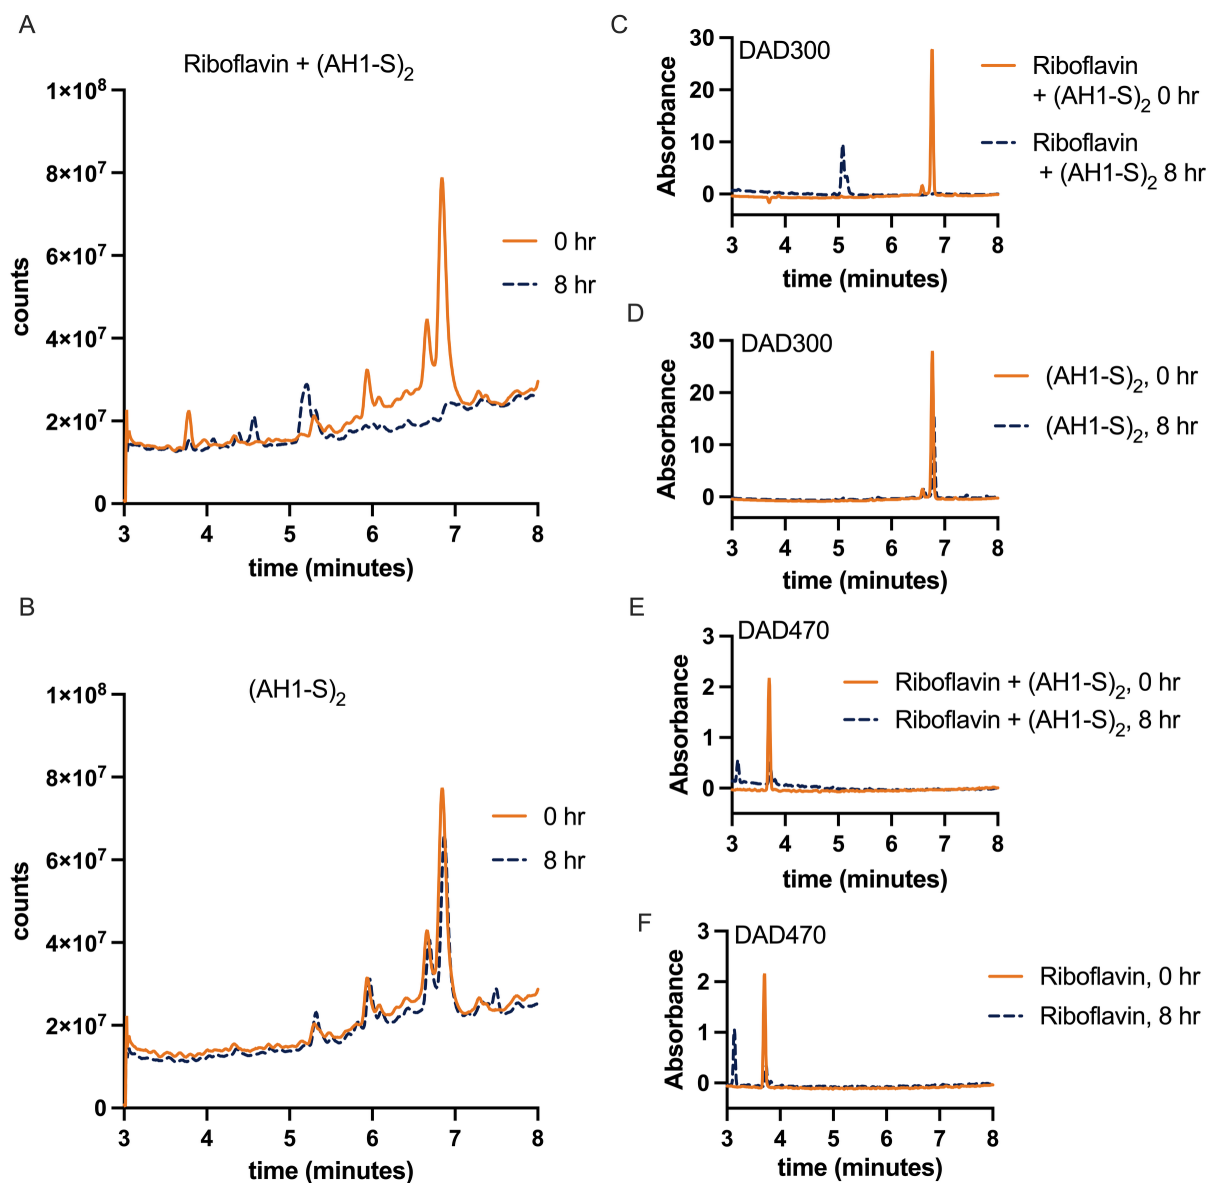

**Figure S4.** LC-MS analysis shows that riboflavin promotes the light-dependent degradation of (AH1-S)<sub>2</sub>. Overlaid total ion chromatograms (TICs) of **(A)** 15  $\mu$ M (AH1-S)<sub>2</sub> + 5.5  $\mu$ M riboflavin or **(B)** (AH1-S)<sub>2</sub> alone in MOPS buffer at 0 h and after 8 h exposed to daylight in an Eppendorf tube. The peak corresponding to (AH1-S)<sub>2</sub> at 6.7 min disappears over time in the combined sample in (A). **(C-D)** Diode array detector (DAD) signals at 300 nm. (AH1-S)<sub>2</sub> elutes ~6.7 min and the unidentified photoproduct elutes at ~5.0 min. **(E-F)** DAD signal at 470 nm, corresponding to riboflavin, which elutes ~3.7 min.

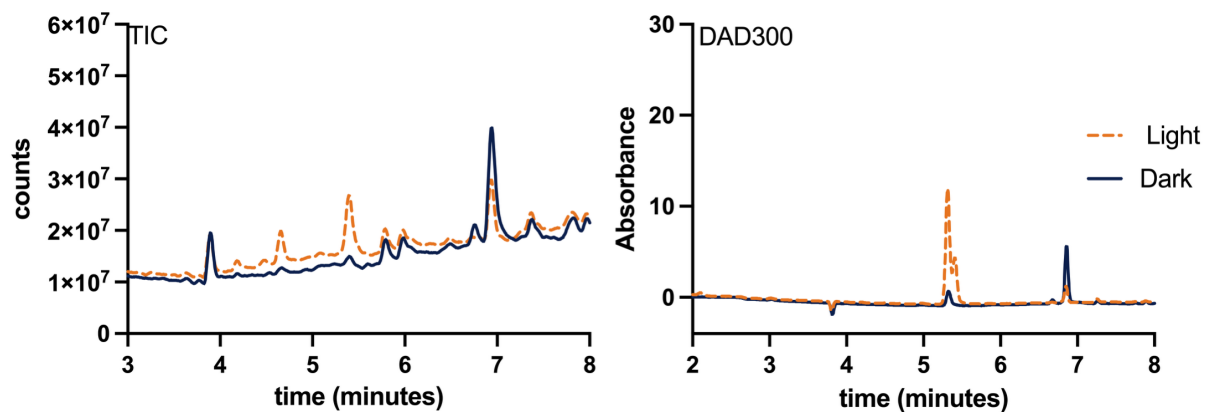

**Figure S5.** LC-MS traces of  $15 \mu\text{M}$   $(\text{AH1-S})_2$  +  $5.5 \mu\text{M}$  riboflavin after 24 h in MOPS buffer under ambient light vs dark (wrapped in foil). Ambient light exposure promotes the degradation to a greater degree than when kept in the dark in MOPS buffer.

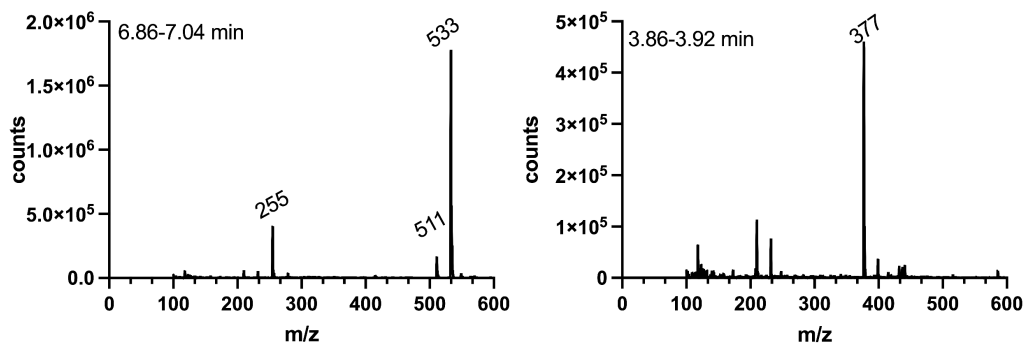

**Figure S6.** Representative mass spectra extracted from TIC traces in Figs. S4A of compounds that elute at  $t_R = 6.8$  min (left) and  $t_R = 3.8$  min (right). The molecular ion peak with a  $m/z$  of 533 corresponds to the sodium adduct of (AH1-S)<sub>2</sub>; the molecular ion peak with an  $m/z$  of 377 corresponds to riboflavin.

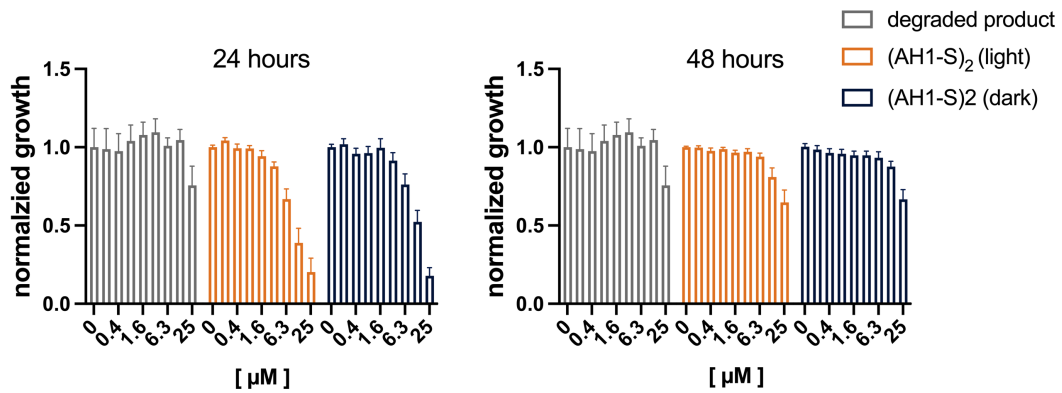

**Figure S7.** (AH1-S)<sub>2</sub> alone inhibits *C. albicans* growth in the dark and light at 24 and 48 h. Degraded product refers to a light-irradiated solution of (AH1-S)<sub>2</sub> and riboflavin in MOPS, with degradation verified by mass spectrometry. Cells were grown in SD medium (1 % DMSO) and growth was measured by OD<sub>600</sub>. (n = 2–11 biological replicates composed of 1–3 technical replicates). Error bars represent SEM.

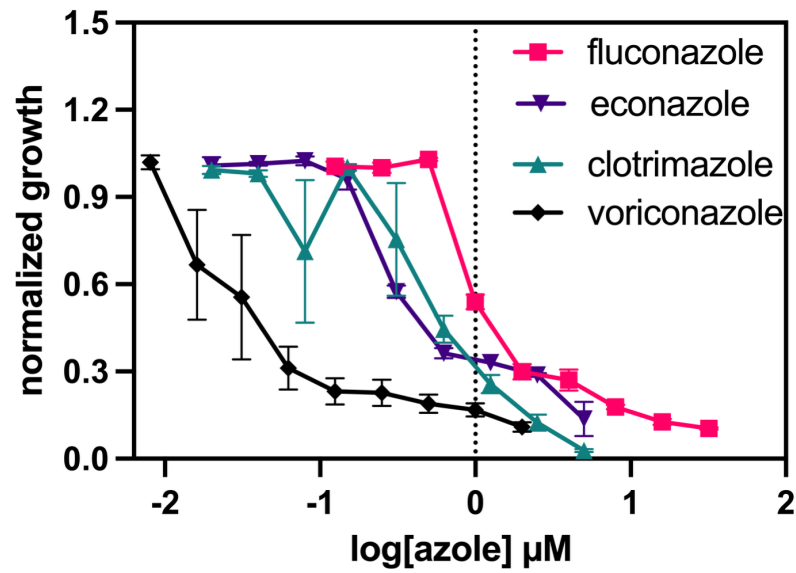

**Figure S8.** Microdilutions of fluconazole, econazole, clotrimazole, and voriconazole against *C. albicans* SC5314 in SD medium. 48 h timepoints are shown. Error bars represent SEM. (n=1 biological replicate of n=3 technical replicates).

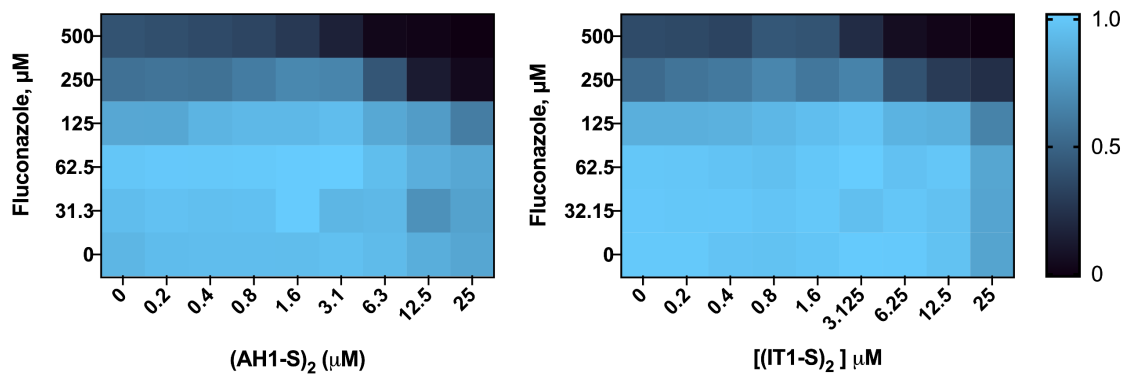

**Figure S9.** Fluconazole and prochelators (AH1-S)<sub>2</sub> (left) and (IT1-S)<sub>2</sub> (right) against *C. albicans* Y172. Cell growth in SD medium (1% DMSO) by OD<sub>600</sub> after 48 h; n=2 biological replicates of 3 technical replicates each.

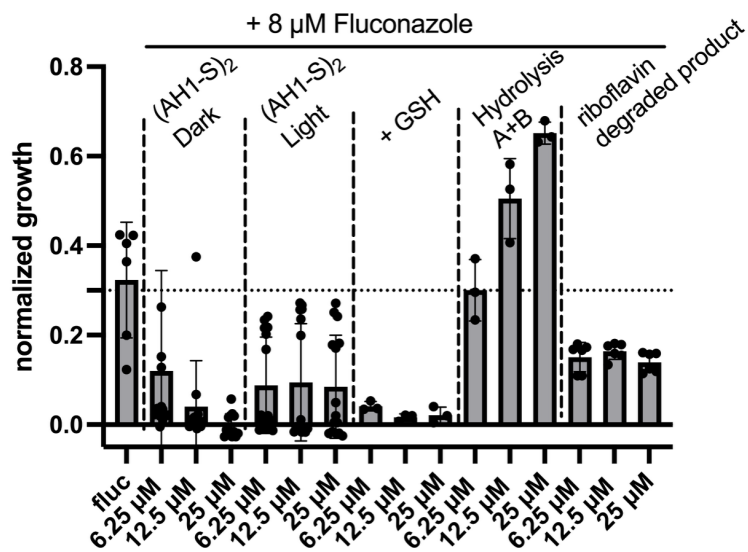

**Figure S10.** Growth assays of *C. albicans* SC5314 treated with 8  $\mu$ M fluconazole and various controls of (AH1-S)<sub>2</sub>: (AH1-S)<sub>2</sub> protected from light exposure (dark), (AH1-S)<sub>2</sub> exposed to ambient room light during the course of the experiment, (AH1-S)<sub>2</sub> treated with 5x GSH to generate AH1 in situ, 2'2'-dithioldibenzyl aldehyde and benzoylhydrazine (hydrolysis products A and B, Fig S2), and a solution of riboflavin and (AH1-S)<sub>2</sub> pre-exposed to sunlight to develop photodegradation products. Growth was measured at 48 h by OD<sub>600</sub> and normalized to the non-treated cells; (n=1-6) biological replicates of 1-3 technical replicates.

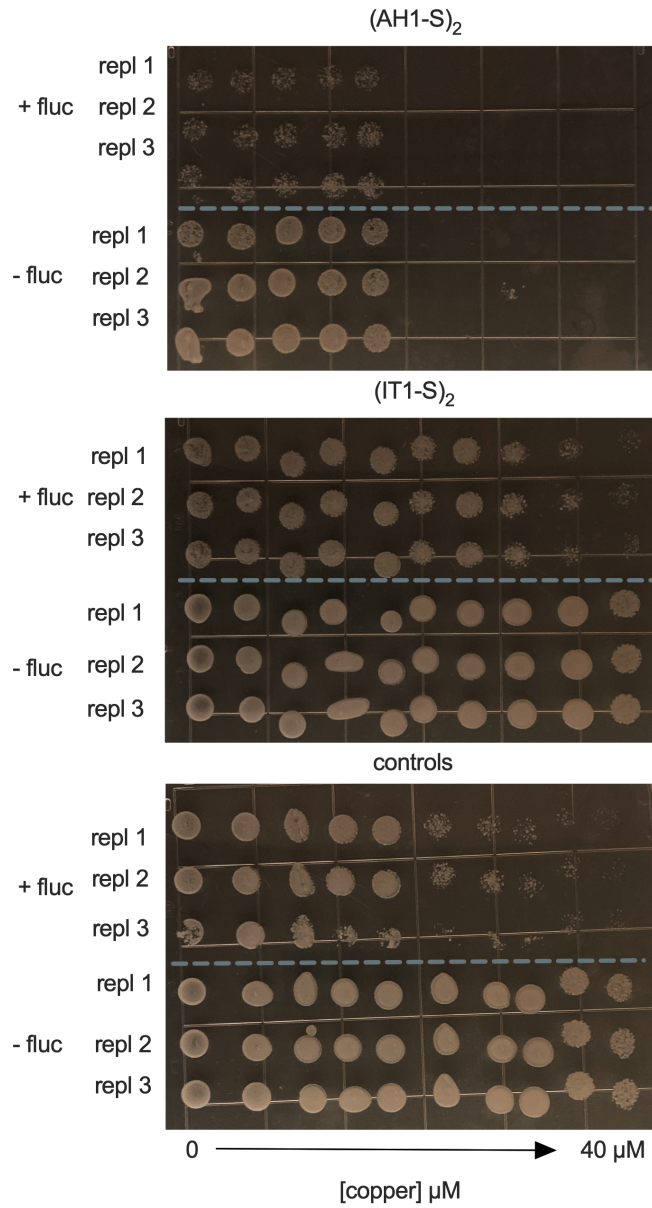

**Figure S11.** Cidalty assays on YPD agar plates after 48 hours. (Top) 15 μM (AH1-S)<sub>2</sub> (middle) (IT1-S)<sub>2</sub> (bottom) fluconazole and no treatment.

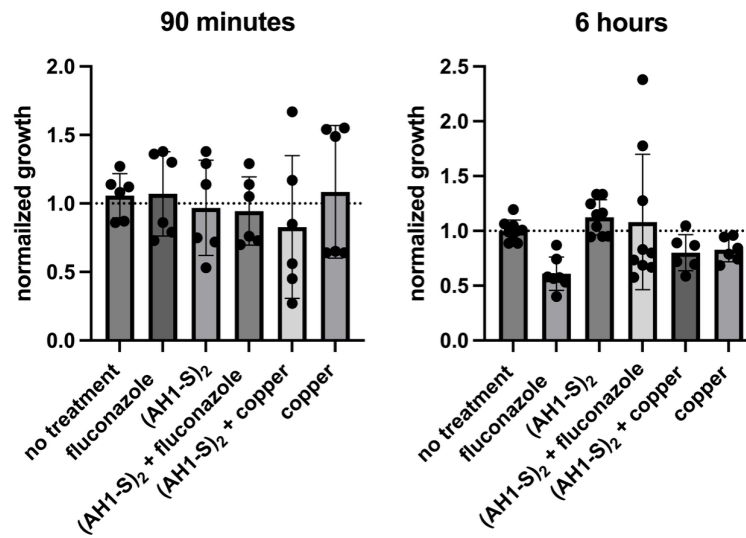

**Figure S12.** Comparison of relative growth levels of *C. albicans* SC5314 in YPD in the large culture volumes (25–100 mL) used for ICP-MS experiments. Treatment conditions: 25  $\mu$ M (AH1-S)<sub>2</sub>, 10  $\mu$ M fluconazole, 10  $\mu$ M copper, or a combination. Under these experimental conditions, fluconazole-treated cells lag in growth compared to non-treated cells at 6 h. (AH1-S)<sub>2</sub> + fluconazole did not on average impact growth compared to non-treated cells. However, the standard deviation for (AH1-S)<sub>2</sub> + fluconazole treated cells is much larger than the non-treated cells at 6 h post-treatment. Growth was measured by OD<sub>600</sub> and normalized to no treatment. (n=2-3 biological replicates each of n=1-3 technical replicates).

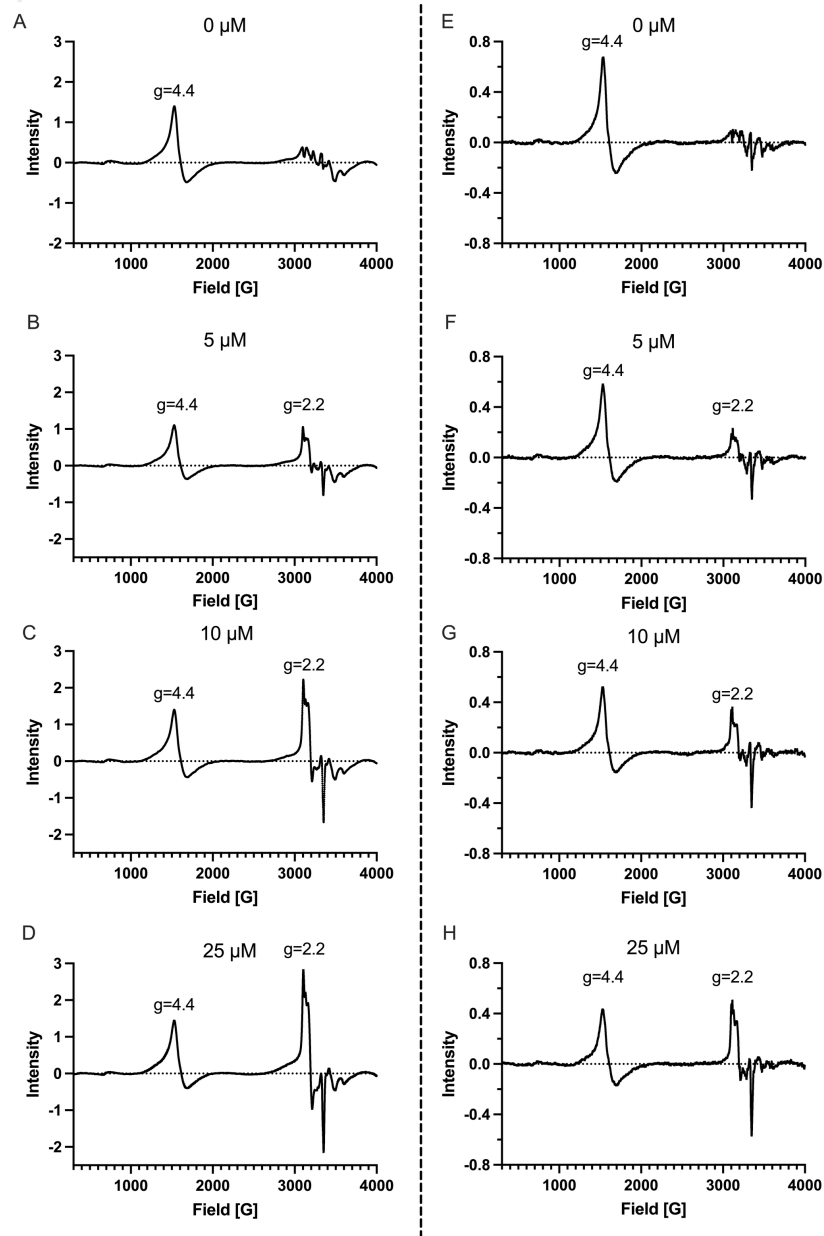

**Figure S13.** Concentration-dependence of whole cell EPR spectra of *C. albicans* treated with 0–50  $\mu\text{M}$  (AH1-S)<sub>2</sub> after 90 min (left) and 6 h (right). An increase in the signal at  $g \sim 2.2$ – $2.0$  as a function of (AH1-S)<sub>2</sub> concentration is observable at both timepoints. For each spectrum,  $2 \times 10^9$  cells were harvested; data collected at 77 K.

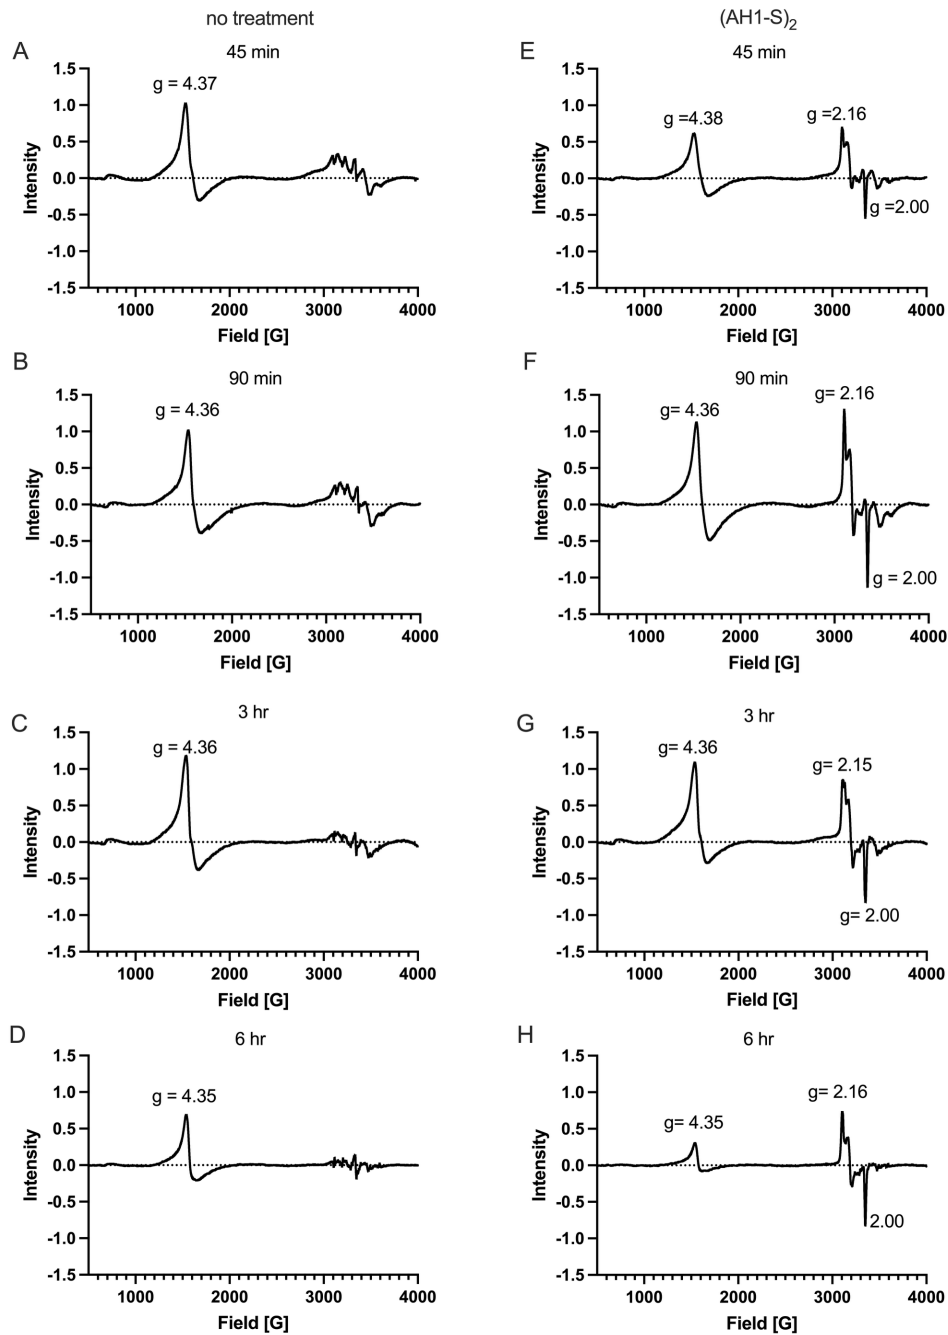

**Figure S14.** Time dependence of whole cell EPR spectra of non-treated *C. albicans* (A–D, left column) compared to treatment with 25 μM (AH1-S)<sub>2</sub> (E–H), right column) for 45 min (A, E), 90 min (B, F), 3 h (C, G), and 6 h (D, H). In non-treated cells, the labile iron and manganese signals diminish over 6 h. In (AH1-S)<sub>2</sub> treated cells, the signal at  $g = 2.16$ – $2.00$  characteristic of low-spin Fe(III)AH1 complexes can be seen as early as 45 min, with the highest signal occurring at 90 min, then diminishing over time. The complex is still observed by 6 h. While both manganese and the Fe(III)AH1 complex give EPR signals  $\sim g=2$ , the manganese signal is distinguished by its unique hyperfine structure, and the rhombic signal attributed to the Fe(III)AH1 complex has  $g$  values characteristic of previously characterized, isolated complexes.

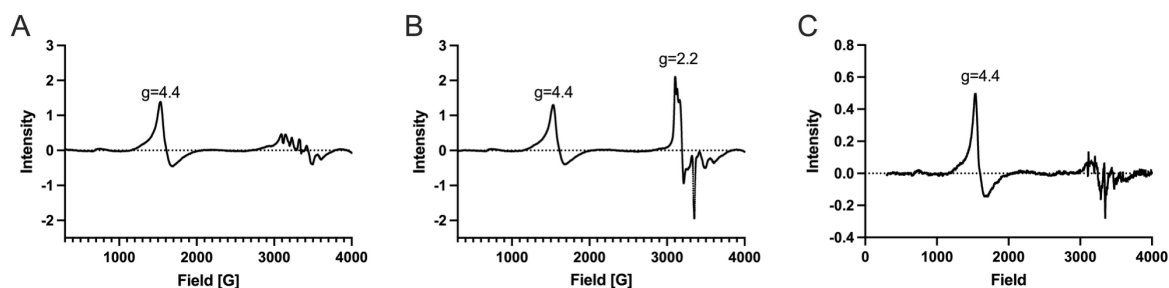

**Figure S15.** Whole cell EPR spectra of *C. albicans* treated with **(A)** 10 μM fluconazole and **(B)** 10 μM fluconazole + 25 μM (AH1-S)<sub>2</sub> after 90 min. Neither fluconazole nor the combined treatment decreases the intensity of the labile iron signal ( $g=4.4$ ) at this timepoint, in contrast to the 6 h data shown in Figures 7B and 7E in the main text. In the combined treatment, the signal corresponding to the low-spin Fe(III) complex with AH1 is observable by 90 min. **(C)** Control experiment showing whole cell EPR spectrum of *C. albicans* 6 h after treatment with 10 μM copper (comparison to Cu + (AH1-S)<sub>2</sub> spectrum shown in Fig. 7 F).

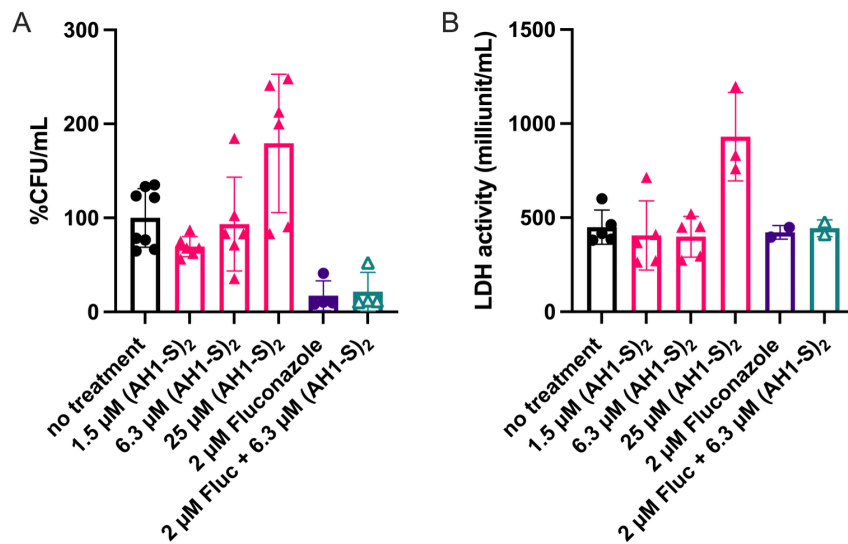

**Figure S16. (A)** Percent colony forming units (CFU) of *C. albicans* SC5314 under monoculture conditions (without macrophages) relative to the CFU of the non-treated monoculture. **(B)** Macrophage cytotoxicity as measured by the LDH assay under monoculture conditions.

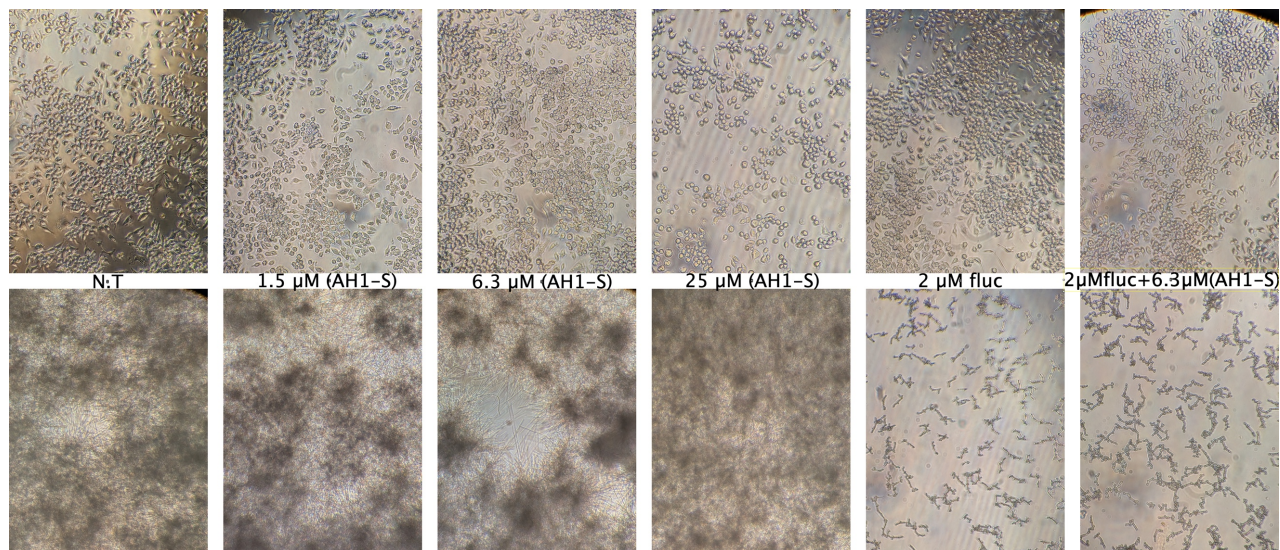

**Figure S17.** Representative images of macrophages grown in mono-culture (upper) and mono-culture *C. albicans* (lower). Cells were treated with 0-25  $\mu\text{M}$  (AH1-S)<sub>2</sub>, 2  $\mu\text{M}$  fluconazole, or a combination in mammalian cell culture conditions.

**Supplementary Table S1.** Vitamins, essential biometals, and other ingredients in SD complete media

|                  |                        | 10x concentration<br>$\mu\text{M}^*$ or $\text{g/L}^+$ | SD concentration<br>$\mu\text{M}^*$ or $\text{g/mL}^+$ |
|------------------|------------------------|--------------------------------------------------------|--------------------------------------------------------|
| Vitamins         | Biotin                 | 0.0819*                                                | 0.00819*                                               |
|                  | Calcium Pantothenate   | 8.39*                                                  | 0.839*                                                 |
|                  | Folic acid             | 0.048*                                                 | 0.0048*                                                |
|                  | Inositol               | 111*                                                   | 11.1*                                                  |
|                  | Niacin                 | 32.5*                                                  | 3.25*                                                  |
|                  | Para-aminobenzoic acid | 14.6*                                                  | 1.46*                                                  |
|                  | Pyridoxine HCl         | 19.4*                                                  | 1.94*                                                  |
|                  | Riboflavin             | 5.3*                                                   | 0.53*                                                  |
|                  | Thiamine HCl           | 10.7*                                                  | 1.07*                                                  |
| Salts /<br>other | Ammonium sulfate       | 50 <sup>+</sup>                                        | 5 <sup>+</sup>                                         |
|                  | Boric acid             | 80.8*                                                  | 8.08*                                                  |
|                  | Calcium chloride       | 1.0 <sup>+</sup>                                       | 0.1 <sup>+</sup>                                       |
|                  | Manganese sulfate      | 5.0 <sup>+</sup>                                       | 0.5 <sup>+</sup>                                       |
|                  | Potassium iodide       | 6.02*                                                  | 0.602*                                                 |
|                  | Potassium phosphate    | 10 <sup>+</sup>                                        | 0.1 <sup>+</sup>                                       |
|                  | Sodium chloride        | 1.0 <sup>+</sup>                                       | 0.1 <sup>+</sup>                                       |
| Metals           | Copper Sulfate         | N/A                                                    | 0.250                                                  |
|                  | Iron Chloride          | N/A                                                    | 0.740                                                  |
|                  | Manganese sulfate      | N/A                                                    | 2.4                                                    |
|                  | Zinc Sulfate           | N/A                                                    | 2.2                                                    |
|                  | Sodium Molybdate       | 8.27 <sup>*</sup>                                      | 0.827*                                                 |
| Sugar            | D-(+)-glucose          | 200 <sup>+</sup>                                       | 20 <sup>+</sup>                                        |

**Supplementary Table S2.** Average values with standard deviations of cellular metals detected by ICP-MS ( $\mu\text{mol}/\text{cell}$ )

|                    | No-treatment           | (AH1-S) <sub>2</sub>    | (AH1-S) <sub>2</sub> + fluconazole | (AH1-S) <sub>2</sub> + copper | Fluconazole            | Copper                 |
|--------------------|------------------------|-------------------------|------------------------------------|-------------------------------|------------------------|------------------------|
| Iron (90 min)      | 4.32E-07<br>± 1.13E-07 | 4.50E-07<br>± 1.70E-07  | 4.20E-07<br>± 1.71E-07             | 3.65E-07<br>± 6.97E-07        | 4.67E-07<br>± 1.29E-07 | 5.11E-07<br>± 3.62E-07 |
| Iron (6 h)         | 2.13E-08<br>± 4.94E-09 | 1.43E-08<br>± 4.02E-09  | 2.19E-08<br>± 9.55E-09             | 3.61E-08<br>± 1.64E-08        | 4.15E-08<br>± 9.10E-09 | 2.99E-08<br>± 1.43E-08 |
| Copper (90 min)    | 1.10E-08<br>± 4.99E-09 | 1.66E-08<br>± 1.22E-08  | 1.68E-08<br>± 1.27E-08             | 5.76E-08<br>± 1.10E-07        | 1.31E-08<br>7.70E-09   | 1.97E-08<br>± 8.06E-09 |
| Copper (6 h)       | 1.42E-09<br>± 1.25E-09 | 1.19E-09<br>± 1.35E-09  | 2.70E-09<br>± 3.43E-09             | 1.29E-08<br>± 5.32E-09        | 2.85E-09<br>± 2.65E-09 | 9.53E-09<br>± 1.33E-09 |
| Zinc (90 min)      | 2.49E-07<br>± 3.96E-08 | 2.90E-07<br>± 8.88E-08  | 2.48E-07<br>± 6.38E-08             | 4.18E-07<br>± 3.94E-07        | 2.25E-07<br>± 5.88E-08 | 2.45E-07<br>± 9.97E-08 |
| Zinc (6 h)         | 4.53E-08<br>± 1.81E-08 | 3.63E-08<br>± 1.78E-08  | 3.43E-08<br>± 1.78E-08             | 6.05E-08<br>± 1.49E-08        | 5.41E-08<br>± 1.39E-08 | 6.19E-08<br>± 8.25E-09 |
| Manganese (90 min) | 2.10E-08<br>± 2.13E-08 | 2.03E-08<br>± 3.49E-09  | 2.13E-08<br>± 4.93E-09             | 2.64E-08<br>± 2.23E-08        | 2.02E-08<br>± 2.76E-09 | 2.03E-08<br>± 7.95E-09 |
| Manganese (6 h)    | 1.02E-09<br>± 5.55E-10 | 7.81 E-10<br>± 3.77E-10 | 1.30E-09<br>± 5.69E-10             | 2.04E-09<br>± 1.36E-09        | 2.08E-09<br>± 6.06E-10 | 1.38E-09<br>± 4.25E-10 |

Data is composed of n=2-3 biological replicates, each of n=1-3 technical replicates.
